# Supplementary material for: Association of Police Transport With Survival Among Patients With Penetrating Trauma in Philadelphia, Pennsylvania
Source: PubMed Central journal article supplement (PMC7835719; doi:10.1001/jamanetworkopen.2020.34868), 2021-01-25
Supplement: jamanetwopen-e2034868-s001.pdf [file jamanetwopen-e2034868-s001.pdf]

## Supplementary Online Content

Winter E, Hynes AM, Shultz K, Holena DN, Malhotra NR, Cannon JW.

Association of police transport with survival among patients with penetrating trauma in Philadelphia, Pennsylvania. *JAMA Netw Open*. 2021;4(1):e2034868. doi:10.1001/jamanetworkopen.2020.34868

**eTable 1.** Mortality in the Whole Cohort

**eTable 2.** Mortality Comparing Police Transport With the Fire Rescue Subgroup of Emergency Medical Services Transport

**eTable 3.** Mortality Comparing Police Transport With the Ambulance Subgroup of Emergency Medical Services Transport

**eTable 4.** Mortality in the Whole Cohort Grouped by Injury Severity

**eFigure 1.** Police vs Emergency Medical Services (EMS) Transport Over Time

**eFigure 2.** Whole Cohort Outcomes

**eFigure 3.** Patient Survival for Police vs Emergency Medical Services (EMS) Transport

This supplementary material has been provided by the authors to give readers additional information about their work.

**eTable 1. Mortality in the Whole Cohort**

|                   |         | Whole Cohort       |                 |                        |                  |
|-------------------|---------|--------------------|-----------------|------------------------|------------------|
|                   |         | Police<br>n = 1970 | EMS<br>n = 1343 | Odds Ratio<br>(95% CI) | P Value          |
| Patient Mortality | Overall | 620 (31.47)        | 258 (19.21)     | 1.93 (1.64-2.28)       | <b>&lt; .001</b> |
|                   | Arrival | 334 (16.95)        | 150 (11.17)     | 1.62 (1.32-2.00)       | <b>&lt; .001</b> |
|                   | 1-Hour  | 398 (20.20)        | 175 (13.03)     | 1.69 (1.39-2.05)       | <b>&lt; .001</b> |
|                   | 6-Hour  | 505 (25.63)        | 213 (15.86)     | 1.83 (1.53-2.18)       | <b>&lt; .001</b> |
|                   | 24-Hour | 560 (28.43)        | 236 (17.54)     | 1.86 (1.57-2.21)       | <b>&lt; .001</b> |

Data shown as n (%) and odds ratio (OR) with 95% CI. Bold text denotes statistically significant result.

**eTable 2.** Mortality Comparing Police Transport With the Fire Rescue Subgroup of Emergency Medical Services Transport

|                   |         | Whole Cohort       |                         |                        |                  | Matched Cohort    |                        |                        |         |
|-------------------|---------|--------------------|-------------------------|------------------------|------------------|-------------------|------------------------|------------------------|---------|
|                   |         | Police<br>n = 1970 | Fire Rescue<br>n = 1205 | Odds Ratio<br>(95% CI) | P Value          | Police<br>n = 797 | Fire Rescue<br>n = 797 | Odds Ratio<br>(95% CI) | P Value |
| Patient Mortality | Overall | 620 (31.47)        | 228 (18.92)             | 1.97 (1.66-2.34)       | <b>&lt; .001</b> | 198 (24.84)       | 203 (25.47)            | 0.82 (0.44-1.49)       | .568    |
|                   | Arrival | 334 (16.95)        | 137 (11.37)             | 1.59 (1.29-1.97)       | <b>&lt; .001</b> | 110 (13.80)       | 124 (15.56)            | 0.65 (0.38-1.09)       | .109    |
|                   | 1-Hour  | 398 (20.20)        | 159 (13.20)             | 1.67 (1.36-2.03)       | <b>&lt; .001</b> | 130 (16.31)       | 144 (18.07)            | 0.59 (0.32-1.05)       | .076    |
|                   | 6-Hour  | 505 (25.63)        | 190 (15.77)             | 1.84 (1.53-2.22)       | <b>&lt; .001</b> | 162 (20.33)       | 171 (21.46)            | 0.71 (0.39-1.27)       | .272    |
|                   | 24-Hour | 560 (28.43)        | 209 (17.34)             | 1.89 (1.58-2.26)       | <b>&lt; .001</b> | 175 (21.96)       | 186 (23.34)            | 0.69 (0.39-1.19)       | .193    |

Data shown as n (%) and odds ratio (OR) with 95% CI. Bold text denotes statistically significant result.

**eTable 3.** Mortality Comparing Police Transport With the Ambulance Subgroup of Emergency Medical Services Transport

|                   |         | Whole Cohort       |                      |                        |             | Matched Cohort    |                      |                        |         |
|-------------------|---------|--------------------|----------------------|------------------------|-------------|-------------------|----------------------|------------------------|---------|
|                   |         | Police<br>n = 1970 | Ambulance<br>n = 138 | Odds Ratio<br>(95% CI) | P Value     | Police<br>n = 129 | Ambulance<br>n = 129 | Odds Ratio<br>(95% CI) | P Value |
| Patient Mortality | Overall | 620 (31.47)        | 30 (21.74)           | 1.65 (1.09-2.51)       | <b>.014</b> | 34 (26.36)        | 29 (22.48)           | 2.67 (0.64-15.61)      | .227    |
|                   | Arrival | 334 (16.95)        | 13 (9.42)            | 1.96 (1.10-3.52)       | <b>.014</b> | 12 (9.30)         | 13 (10.08)           | 0.83 (0.20-3.28)       | 1.000   |
|                   | 1-Hour  | 398 (20.20)        | 16 (11.59)           | 1.93 (1.13-3.29)       | <b>.009</b> | 17 (13.18)        | 16 (12.40)           | 1.25 (0.27-6.30)       | 1.000   |
|                   | 6-Hour  | 505 (25.63)        | 23 (16.67)           | 1.72 (1.09-2.73)       | <b>.014</b> | 22 (17.05)        | 22 (17.05)           | 1.00 (0.30-3.34)       | 1.000   |
|                   | 24-Hour | 560 (28.43)        | 27 (19.57)           | 1.63 (1.06-2.51)       | <b>.020</b> | 29 (22.48)        | 26 (20.16)           | 1.50 (0.48-5.12)       | .607    |

Data shown as n (%) and odds ratio (OR) with 95% CI. Bold text denotes statistically significant result.

**eTable 4.** Mortality in the Whole Cohort Grouped by Injury Severity

|         |     |       | Whole Cohort      |                |                     |             |
|---------|-----|-------|-------------------|----------------|---------------------|-------------|
|         |     |       | Police<br>n=1970* | EMS<br>n=1343† | Odds Ratio (95% CI) | P Value     |
| Overall | ISS | 1-8   | 34 (9.07)         | 22 (4.44)      | 2.15 (1.23-3.74)    | <b>.006</b> |
|         |     | 9-25  | 207 (19.68)       | 92 (14.72)     | 1.42 (1.09-1.86)    | <b>.010</b> |
|         |     | 26-75 | 379 (70.06)       | 144 (64.86)    | 1.27 (0.91-1.77)    | .163        |
| Arrival | ISS | 1-8   | 26 (6.93)         | 20 (4.03)      | 1.77 (0.97-3.23)    | .060        |
|         |     | 9-25  | 106 (10.08)       | 47 (7.52)      | 1.38 (0.96-1.97)    | .075        |
|         |     | 26-75 | 202 (37.34)       | 82 (37.39)     | 1.00 (0.72-1.38)    | .989        |
| 1-Hour  | ISS | 1-8   | 31 (8.27)         | 22 (4.44)      | 1.94 (1.10-3.41)    | <b>.020</b> |
|         |     | 9-25  | 126 (11.98)       | 61 (9.76)      | 1.26 (0.91-1.74)    | .160        |
|         |     | 26-75 | 241 (44.55)       | 92 (41.44)     | 1.14 (0.83-1.56)    | .432        |
| 6-Hour  | ISS | 1-8   | 33 (8.80)         | 22 (4.44)      | 2.08 (1.19-3.63)    | <b>.009</b> |
|         |     | 9-25  | 164 (15.59)       | 77 (12.32)     | 1.31 (0.98-1.76)    | .063        |
|         |     | 26-75 | 308 (56.93)       | 114 (51.35)    | 1.25 (0.92-1.71)    | .160        |
| 24-Hour | ISS | 1-8   | 34 (9.07)         | 22 (4.44)      | 2.15 (1.23-3.74)    | <b>.006</b> |
|         |     | 9-25  | 186 (17.68)       | 83 (13.28)     | 1.40 (1.06-1.86)    | <b>.016</b> |
|         |     | 26-75 | 340 (62.85)       | 131 (59.01)    | 1.18 (0.85-1.62)    | .323        |

Data shown as n (%) and odds ratio (OR) with 95% CI. Bold text denotes statistically significant result.  
Emergency Medical Services, EMS; Injury Severity Score, ISS

\*ISS 1-8 n=375, 9-25 n=1052, 26-75 n=543

†ISS 1-8 n= 496, 9-25 n=625, 26-75 n=222

**A**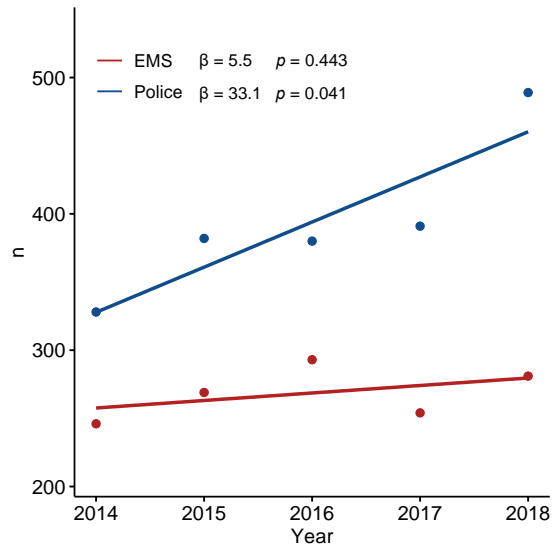**B**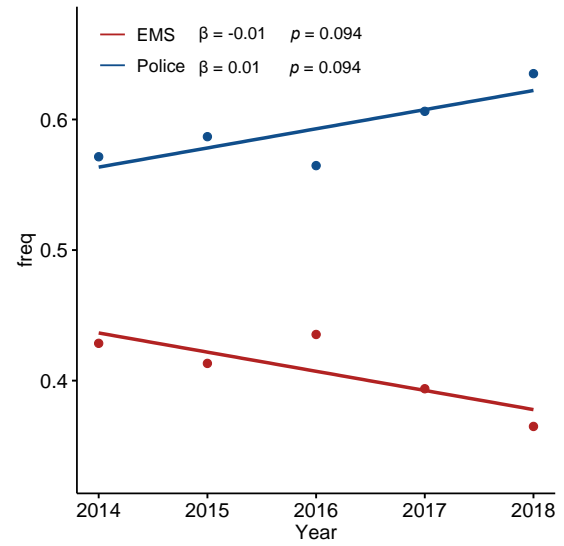

**eFigure 1.** Police vs Emergency Medical Services (EMS) Transport Over Time

(A) Number of transports in each cohort from 2014 to 2018. (B) Relative frequency of police vs EMS transport for each year from 2014 to 2018.

**A**

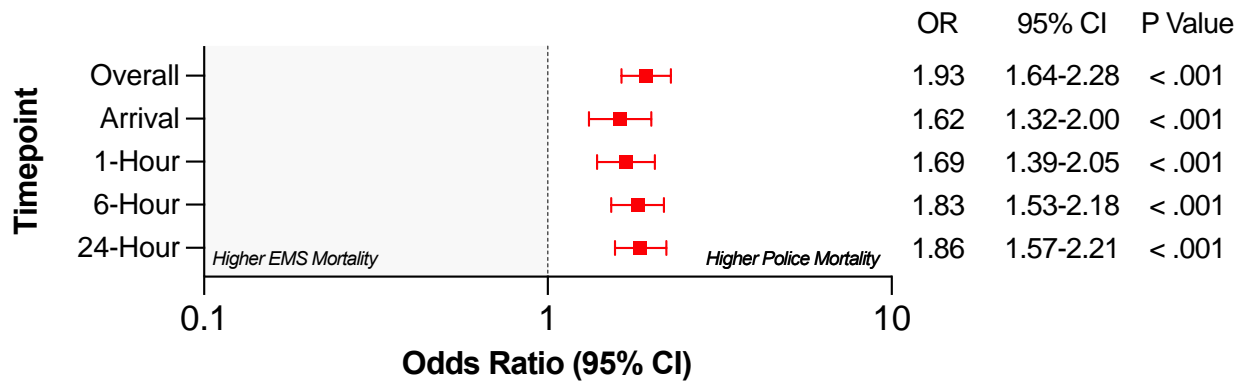

**B**

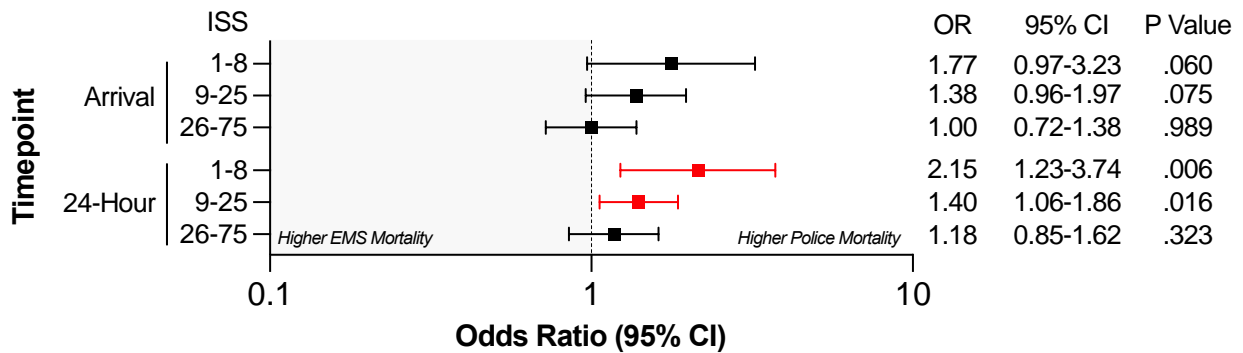

**eFigure 2.** Whole Cohort Outcomes

(A) Odds ratios and 95% confidence intervals for whole cohort patient outcomes at several different time points after trauma center arrival. (B) Odds ratios and 95% confidence intervals for whole cohort patient outcomes with different injury severity scores, at several different time points after trauma center arrival.

**A**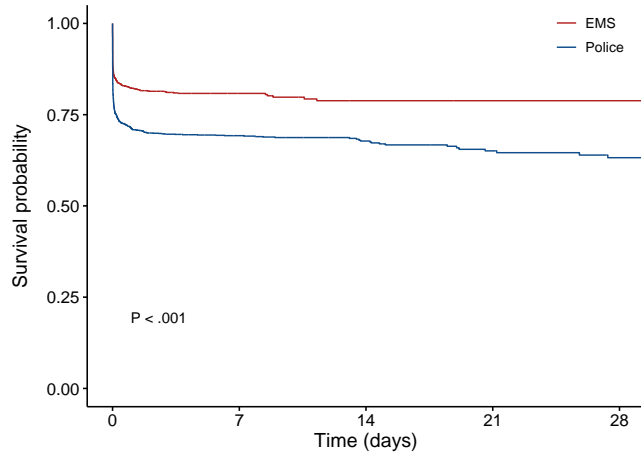

|        |      |     |     |     |    |
|--------|------|-----|-----|-----|----|
| EMS    | 1343 | 315 | 113 | 64  | 32 |
| Police | 1970 | 613 | 270 | 141 | 82 |

**B**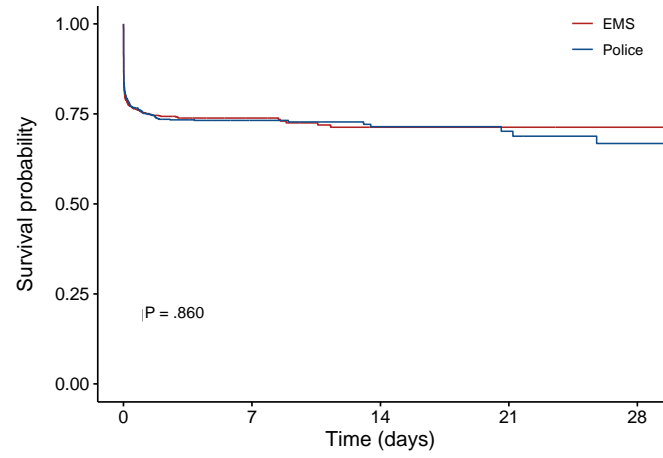

|        |     |     |    |    |    |
|--------|-----|-----|----|----|----|
| EMS    | 870 | 223 | 82 | 46 | 24 |
| Police | 870 | 242 | 98 | 51 | 29 |

**eFigure 3. Patient Survival for Police vs Emergency Medical Services (EMS) Transport**

(A) Kaplan-Meier curve comparing unadjusted 28-day survival for the whole cohort. (B) Kaplan-Meier curve comparing unadjusted 28-day survival for the matched cohort.
